# Supplementary material
Source: publisher figshare collection journal article supplement (https://karger.figshare.com/articles/dataset/_/10048214)
Supplement: Supplementary file 1 [file 1]

**Supplementary Table 1: Angiographic features of percutaneous coronary intervention procedures according to the presence of moderate chronic kidney disease**

|                                                      | <b>CrCl&lt;60ml/min<br/>N=236</b> | <b>CrCl≥60ml/min<br/>N=1965</b> | <b>P-Value</b> |
|------------------------------------------------------|-----------------------------------|---------------------------------|----------------|
| <b>Severe calcifications</b>                         | 38 (16%)                          | 210 (11%)                       | <0.01          |
| <b>Any intervention (any of the below indicated)</b> | 236 (100%)                        | 1963 (99.9%)                    | 0.6            |
| <b>Pre-dilation of at least one target lesion</b>    | 182 (77%)                         | 1492 (76%)                      | 0.7            |
| <b>Stents implanted in the target vessel</b>         | 234 (99%)                         | 1949 (99%)                      | 1.0            |
| <b>Number of stents implanted</b>                    | 1.6±0.9                           | 1.5±0.9                         | 0.3            |
| 1 stent                                              | 135 (57%)                         | 1215 (61%)                      | 0.2            |
| 2 stents                                             | 65 (27%)                          | 498 (23%)                       | 0.5            |
| 3 stents                                             | 27 (11%)                          | 159 (8%)                        | 0.1            |
| 4 stents                                             | 4 (2%)                            | 59 (3.0%)                       | 0.3            |
| >4 stents                                            | 3 (1%)                            | 18 (0.9%)                       | 0.6            |
| <b>Patients with overlapping stents</b>              | 33 (14%)                          | 322 (16%)                       | 0.3            |
| <b>Total stent length implanted (mm)</b>             | 32.5±20.7                         | 30.9±19.5                       | 0.2            |
| <b>Any post-stent dilation</b>                       | 141 (60%)                         | 1222 (63%)                      | 0.5            |
| <b>Number of diseased vessels</b>                    | 1.4±0.6                           | 1.3±0.6                         | 0.3            |
| 1 vessel                                             | 163 (69%)                         | 1403 (71%)                      | 0.5            |
| 2 vessels                                            | 54 (23%)                          | 448 (22%)                       | 1.0            |
| 3 vessels                                            | 19 (8%)                           | 114 (6%)                        | 0.2            |
| <b>Location of diseased vessels</b>                  |                                   |                                 |                |
| LAD/Diagonal                                         | 121 (51%)                         | 1078 (55%)                      | 0.3            |
| LCX/OM/Ramus                                         | 85 (36%)                          | 677 (34%)                       | 0.6            |
| RCA/RPDA/RPL                                         | 104 (44%)                         | 830 (42%)                       | 0.6            |
| LM                                                   | 5 (2%)                            | 20 (1%)                         | 0.1            |
| Bypass vein or artery                                | 14 (6%)                           | 42 (2%)                         | <0.001         |
| <b>Number of lesions treated</b>                     | 1.4±0.6                           | 1.3±0.6                         |                |
| 1 lesion                                             | 169 (71%)                         | 1500 (76%)                      | 0.1            |
| 2 lesions                                            | 49 (21%)                          | 381 (19%)                       | 0.6            |
| 3 lesions                                            | 18 (8%)                           | 77 (4%)                         | <0.01          |
| 4 lesions                                            | 0 (0%)                            | 7 (0.4%)                        | 0.4            |
| <b>Bailout Procedure</b>                             | 4 (1%)                            | 25 (1%)                         | 0.8            |
| Ridaforolimus-eluting stents                         | 3 (1%)                            | 15 (0.8%)                       | 0.9            |
| Zotarolimus-eluting stents                           | 1 (0.4%)                          | 10 (0.5%)                       | 1.0            |
| <b>Any procedural complication</b>                   | 12 (5%)                           | 114 (6%)                        | 0.7            |
| <b>Any staged procedure planned</b>                  | 11 (5%)                           | 69 (3%)                         | 0.4            |
| <b>Procedure duration (minutes)</b>                  | 46.1±34.0                         | 45.9±30.2                       | 0.9            |
| <b>Number of hospital nights</b>                     | 1.3±1.1                           | 1.2±1.3                         | 0.4            |

Abbreviations: CrCl, creatinine clearance; LAD, left anterior descending; LCX, left circumflex; LM, left main; OM, obtuse marginal ;RCA, right coronary artery; RPDA, right posterior descending coronary artery; RPL, Right posterolateral branch of the right coronary artery.

**Supplementary Table 2: Clinical outcomes one-year following percutaneous coronary intervention, according to moderate chronic kidney disease**

|                                            | <b>CrCl&lt;60ml/min<br/>N=236</b> | <b>CrCl≥60ml/min<br/>N=1965</b> | <b>P-Value</b> |
|--------------------------------------------|-----------------------------------|---------------------------------|----------------|
| <b>All-cause mortality</b>                 | 7 (3%)                            | 18 (0.9%)                       | <0.01          |
| <b>Cardiovascular death</b>                | 6 (2%)                            | 8 (0.4%)                        | <0.0001        |
| <b>Cardiovascular death/ MI</b>            | 15 (6%)                           | 92 (5%)                         | 0.3            |
| <b>Non-cardiovascular death</b>            | 1 (0.4%)                          | 10 (0.5%)                       | 0.9            |
| <b>MACE</b>                                | 15 (6%)                           | 128 (7%)                        | 0.9            |
| <b>TLF</b>                                 | 12 (5%)                           | 102 (5%)                        | 0.9            |
| <b>TVF</b>                                 | 16 (7%)                           | 135 (7%)                        | 1.0            |
| <b>MACE/TLF/TVF</b>                        | 19 (8%)                           | 160 (8%)                        | 1.0            |
| <b>MI</b>                                  | 10 (4%)                           | 86 (4%)                         | 0.9            |
| Q-wave                                     | 3 (1.3%)                          | 8 (0.4%)                        | 0.1            |
| Non Q-wave                                 | 7 (3%)                            | 79 (4%)                         | 0.4            |
| Undetermined                               | 0 (0.0%)                          | 3 (0.2%)                        | 0.6            |
| <b>Target Vessel MI</b>                    | 7 (3%)                            | 59 (3%)                         | 1.0            |
| <b>Clinically driven revascularization</b> | 10 (4%)                           | 156 (8%)                        | <0.05          |
| <b>Any revascularization</b>               | 10 (4%)                           | 156 (8%)                        | <0.05          |
| PCI                                        | 10 (4%)                           | 143 (7%)                        | 0.1            |
| CABG                                       | 0 (0.0%)                          | 13 (0.6%)                       | 0.2            |

Abbreviations: CABG, coronary artery bypass graft; CrCl, creatinine clearance; MACE, major adverse cardiac events; MI, myocardial infarction; PCI, percutaneous coronary intervention procedure ; TLF, target lesion failure; TVF, target vessel failure.

**Supplementary Table 3: Repeated angiography in patients with severe cardiovascular event, according to moderate chronic kidney disease**

| <b>Severe Cardiovascular Adverse Event</b>                        | <b>CrCl&lt;60ml/min</b> | <b>CrCl≥60ml/min</b> | <b>P-Value</b> |
|-------------------------------------------------------------------|-------------------------|----------------------|----------------|
| <b>Angina Pectoris/Chest Pain</b>                                 | 13/24 (54%)             | 165/205 (80%)        | 0.06           |
| <b>Acute Myocardial Infarction or<br/>Acute Coronary Syndrome</b> | 9/13 (69%)              | 80/120 (67%)         | 0.5            |
| <b>Myocardial Ischemia</b>                                        | 1/1 (100%)              | 8/9 (89%)            | 1.0            |
| <b>All</b>                                                        | 23/38 (61%)             | 253/334 (76%)        | <0.05          |

**Supplementary Figure 1:** Study Population Flow Diagram
